# Supplementary material
Source: Springer Nature journal article supplement (https://www.springermedizin.de/resource/supplementary/12889_2010_2473_MOESM4_ESM.pdf/9486006)

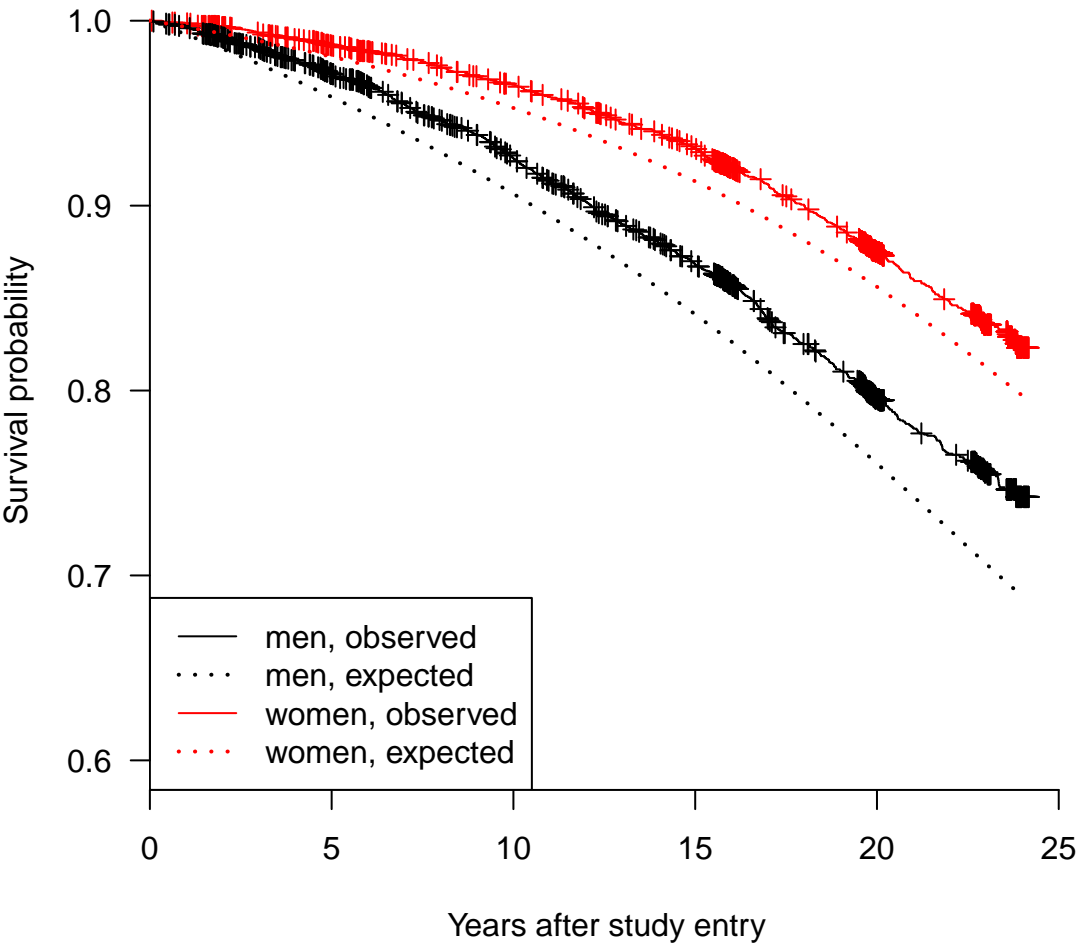

Supplement: MOESM4 [file 9486006]
